# Supplementary material
Source: PubMed Central journal article supplement (PMC10198264)
Supplement: NIHMS1861744-supplement-SI.pdf [file NIHMS1861744-supplement-SI.pdf]

# Supplementary Information

Enzymatic RNA Biotinylation for Affinity Purification and Identification of RNA-protein Interactions

Kayla N. Busby,<sup>†</sup> Amitkumar Fulzele,<sup>‡</sup> Dongyang Zhang,<sup>†</sup> Eric J. Bennett,<sup>‡</sup> and Neal K. Devaraj<sup>\*,†</sup>

<sup>†</sup>Department of Chemistry and Biochemistry and <sup>‡</sup>Division of Biological Sciences, University of California, San Diego, La Jolla, CA 92093, USA

## Supplementary Figures and Tables

Supplementary Figure S1: Quantification of RNA recovery with reduced RNA concentrations

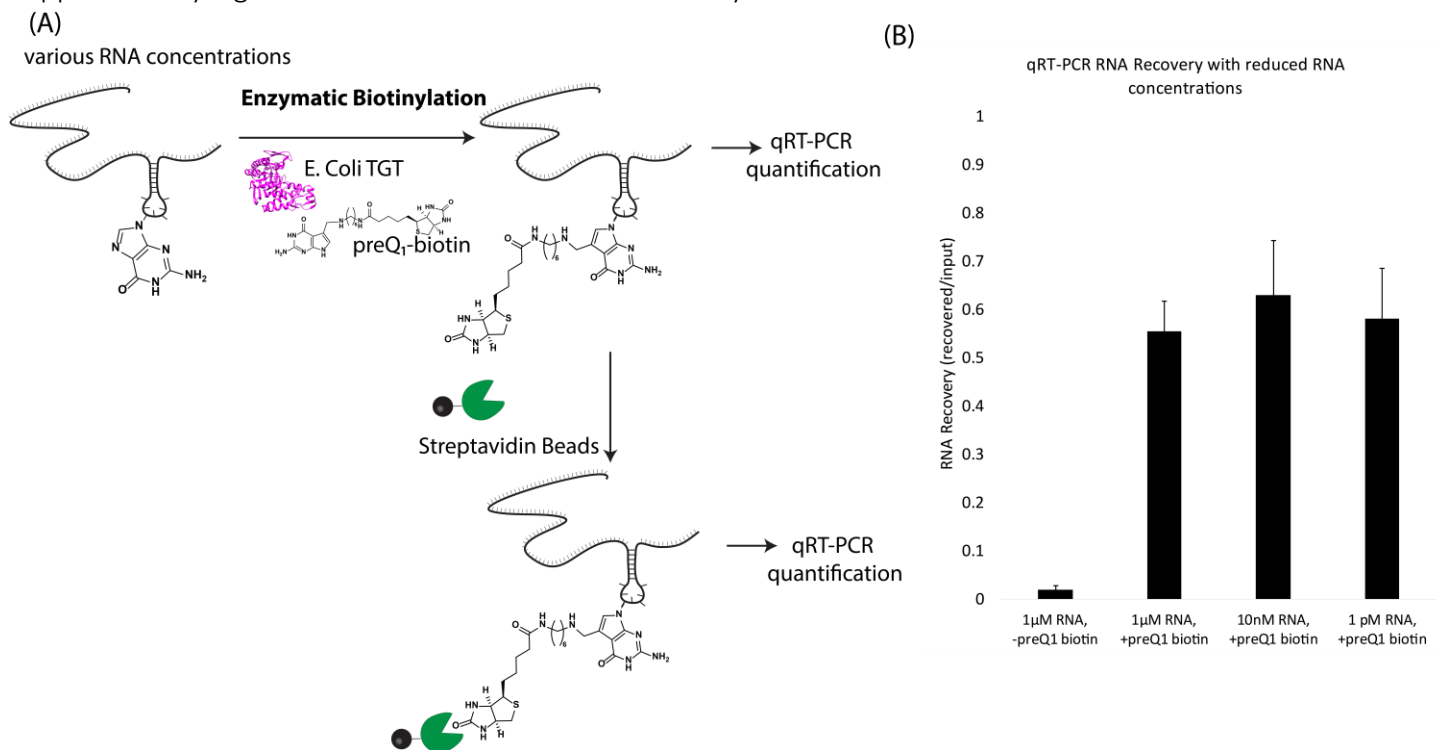

(A) HDAC2-TAG RNA at the indicated concentrations (1 μM, 10 nM, 1 pM) was treated with preQ<sub>1</sub>-biotin and TGT under standard labeling conditions. After precipitation of the RNA product, RNA was diluted to uniform concentrations for RT-qPCR analysis. Input RNA was quantified by qRT-PCR, alongside RNA that was affinity purified using Dynabeads M-280 Streptavidin. (B) RNA recovery values were determined by comparison of the input and recovered RNA C<sub>T</sub> values, as described in Methods. Biotinylation of RNA was observed in RNA concentrations as low as 1 pM.

Supplementary Figure S2: Northern blot assay of HDAC2-TAG and 7SK-TAG RNA transcripts used in mass spectrometry experiments

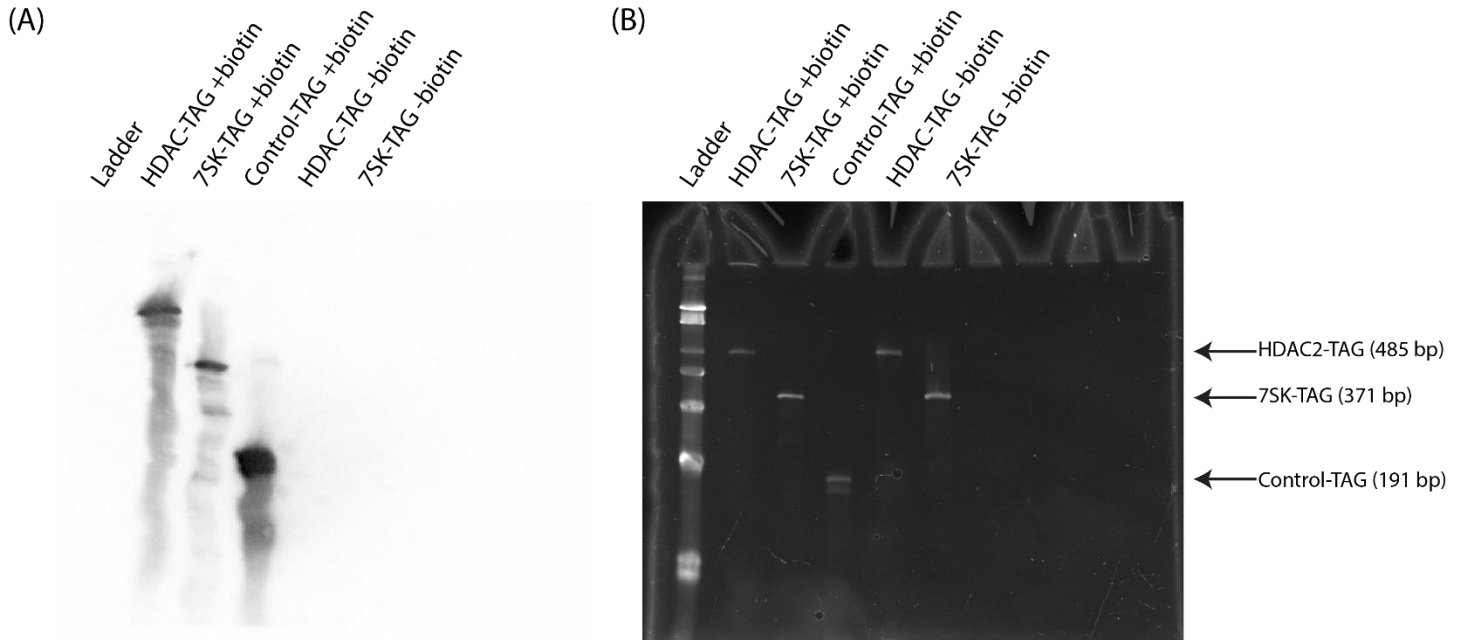

Northern blot results for transcripts used in HDAC2-TAG and 7SK-TAG proteomics experiments (A) Biotin detection (B) SYBR green staining.

Supplementary Figure S3: Northern blot assay of HOTAIR mutant labeling

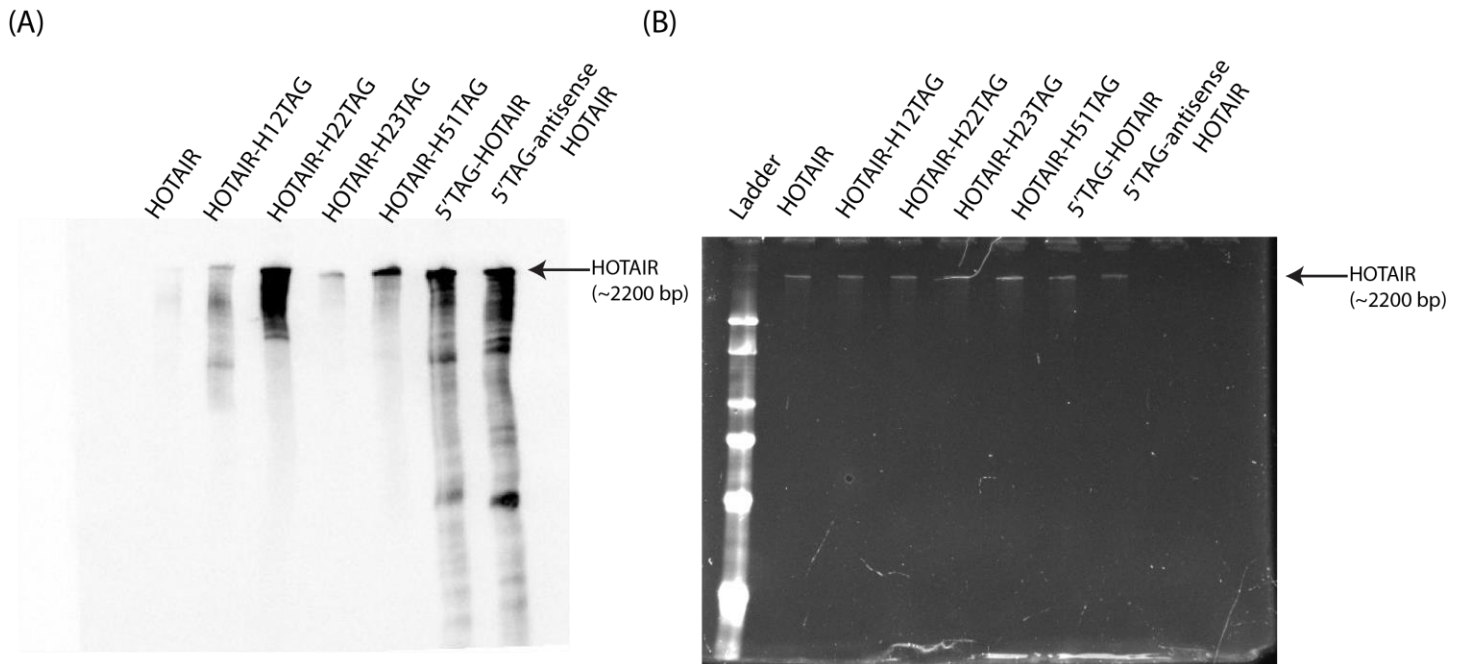

Northern blot results of HOTAIR labeling assay (A) Biotin detection (B) SYBR green staining.

Supplementary Figure S4: HOTAIR labeling with preQ1-BODIPY

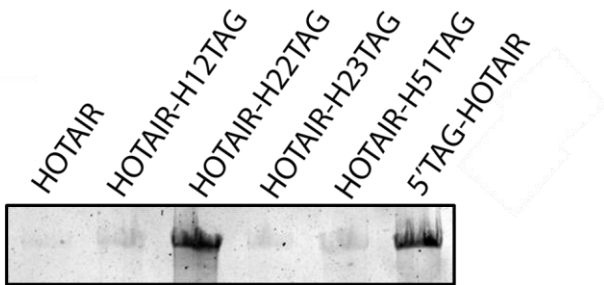

Polyacrylamide gel electrophoresis of HOTAIR constructs treated with TGT and preQ<sub>1</sub>-BODIPY. 1 μM RNA was treated with 1 μM *E. Coli* TGT and 10 μM preQ<sub>1</sub>-BODIPY<sup>1</sup> for 2 h at 37°C. RNA was subsequently precipitated with lithium chloride and analyzed via 4% denaturing UREA-PAGE. BODIPY fluorescence was detected using a Bio-Rad ChemiDoc-MP imager.

Supplementary Figure S5: Northern blot assay of HOTAIR transcripts used in mass spectrometry experiments

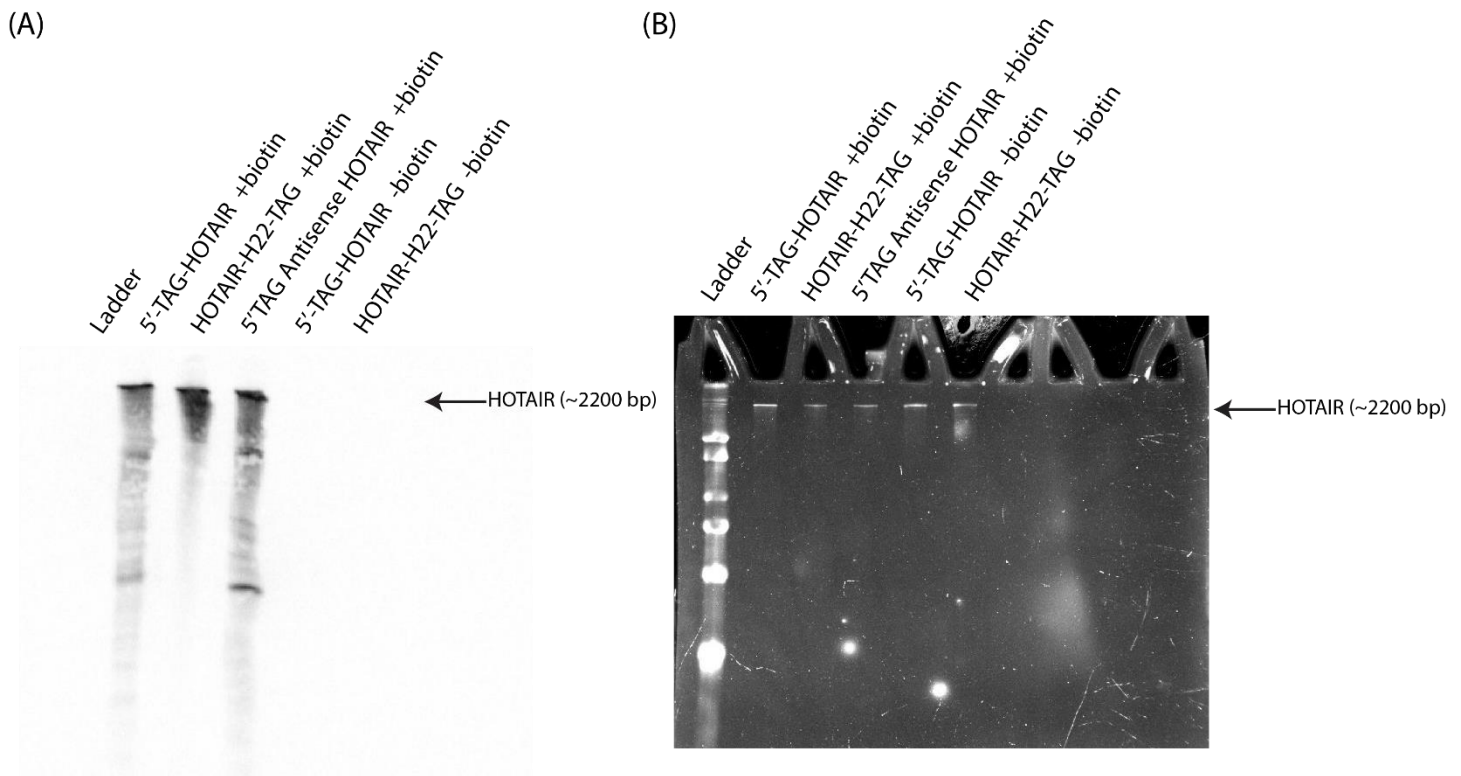

Northern blot results for transcripts used in HOTAIR proteomics experiments (A) Biotin detection (B) SYBR green staining.

Supplementary Figure S6: Heatmap of the count matrix.

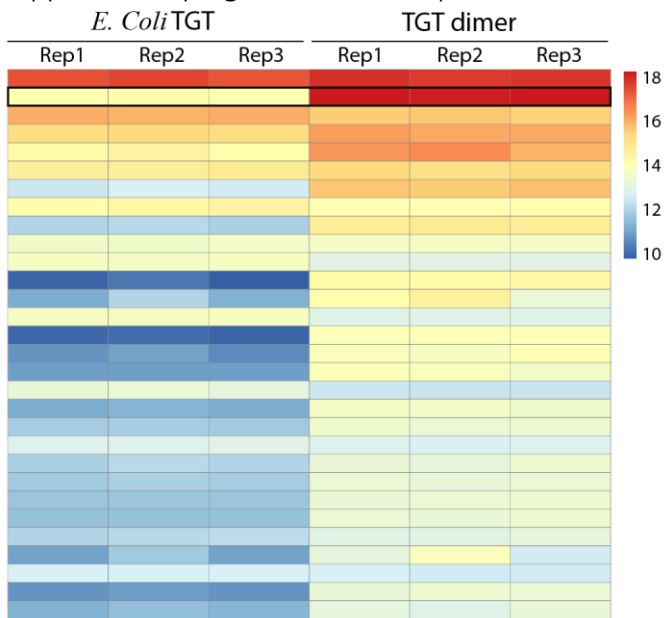

All genes are sorted based on their mean expression under TGT dimer treatment condition. The first thirty genes are visualized in this heatmap. “HDAC-TAG-Puro” gene is ranked second on the heatmap and denoted with a black rectangular box.

Supplementary Table 1: Putative TAG-like sequences in human transcripts

| Gene   | Transcript accession number | TAG-like cDNA Sequence |
|--------|-----------------------------|------------------------|
| GAPDH  | NM_001256799.3              | 'CATGGGTGTGAACCATG'    |
| LBR    | NM_002296.4                 | 'ACTCCCTGTAAAGGAGT'    |
| MRPL51 | NM_016497.4                 | 'GGAAACTGTACTTTTCC'    |
| MALAT1 | NR_002819.4                 | 'AGAAAATGTTTTTTTCT'    |

Supplementary Table 2: qPCR  $\Delta$ Ct data of initial selectivity screen

|                  |      | <b><math>\Delta</math>Ct (purified-input)</b> |           |           |
|------------------|------|-----------------------------------------------|-----------|-----------|
|                  |      | E Coli TGT                                    | TGT Dimer | No Enzyme |
| <b>HDAC2-TAG</b> | Rep1 | 0.34                                          | 0.85      | 13.03     |
|                  | Rep2 | 0.21                                          | 1.5       | 15.29     |
|                  | Rep3 | 0.75                                          | 1.31      | 16.98     |
| <b>GAPDH</b>     | Rep1 | 5.00                                          | 12.83     | 15.19     |
|                  | Rep2 | 8.01                                          | 11.8      | 21.24     |
|                  | Rep3 | 8.57                                          | 11.72     | 19.17     |
| <b>Actin</b>     | Rep1 | 10.13                                         | 16.45     | 17.03     |
|                  | Rep2 | 14.24                                         | 13.83     | 18.18     |
|                  | Rep3 | 12.5                                          | 17.54     | 17.16     |
| <b>LBR</b>       | Rep1 | 9.68                                          | 10.46     | 12.03     |
|                  | Rep2 | 9.76                                          | 10.3      | 12.96     |
|                  | Rep3 | 9.47                                          | 13.25     | 13.67     |
| <b>U1 snRNA</b>  | Rep1 | 16.8                                          | 20.65     | 13.89     |
|                  | Rep2 | 19.09                                         | 21.17     | 20.15     |
|                  | Rep3 | 17.61                                         | 15.14     | 12.72     |
| <b>18s rRNA</b>  | Rep1 | 11.37                                         | 18.2      | 11.6      |
|                  | Rep2 | 13.56                                         | 17.82     | 18.81     |
|                  | Rep3 | 13.85                                         | 14.95     | 10.61     |

Supplementary Table 3: Calculated qPCR Recovery of initial selectivity screen

| <b>Calculated RNA Recovery (mean <math>\pm</math> S.D., 3 replicates)</b> |                      |                      |                      |
|---------------------------------------------------------------------------|----------------------|----------------------|----------------------|
|                                                                           | E Coli TGT           | TGT Dimer            | No Enzyme            |
| <b>HDAC2-TAG</b>                                                          | 75.0 $\pm$ 13.9%     | 43.7 $\pm$ 10.5%     | 0.0051 $\pm$ 0.0060% |
| <b>GAPDH</b>                                                              | 1.25 $\pm$ 1.62%     | 0.024 $\pm$ 0.009%   | 0.0010 $\pm$ 0.0015% |
| <b>Actin</b>                                                              | 0.037 $\pm$ 0.045%   | 0.0028 $\pm$ 0.0035% | 0.0006 $\pm$ 0.0002% |
| <b>LBR</b>                                                                | 0.13 $\pm$ 0.01%     | 0.054 $\pm$ 0.038%   | 0.015 $\pm$ 0.008%   |
| <b>U1 snRNA</b>                                                           | 0.0005 $\pm$ 0.0004% | 0.0010 $\pm$ 0.0016% | 0.0072 $\pm$ 0.0074% |
| <b>18s rRNA</b>                                                           | 0.018 $\pm$ 0.018%   | 0.0013 $\pm$ 0.0016% | 0.032 $\pm$ 0.032%   |

Supplementary Table 4: qPCR  $\Delta$ Ct data examining RNA-Seq Transcripts

|                  |      | <b>dCt (purified-input)</b> |           |           |
|------------------|------|-----------------------------|-----------|-----------|
|                  |      | E Coli TGT                  | TGT Dimer | No Enzyme |
| <b>HDAC2-TAG</b> | Rep1 | 0.82                        | 1.14      | 7.08      |
|                  | Rep2 | 0.55                        | 1.11      | 7.38      |
|                  | Rep3 | 0.91                        | 1.21      | 6.88      |
| <b>FTH1</b>      | Rep1 | 2.98                        | 6.21      | 12.62     |
|                  | Rep2 | 2.47                        | 6.26      | 12.59     |
|                  | Rep3 | 2.98                        | 6.15      | 12.38     |
| <b>RPS6</b>      | Rep1 | 4.27                        | 7.18      | 13.37     |
|                  | Rep2 | 3.07                        | 6.72      | 13.7      |
|                  | Rep3 | 4.13                        | 7.11      | 12.93     |
| <b>RPL41</b>     | Rep1 | 4.27                        | 8.07      | 14.68     |
|                  | Rep2 | 4.11                        | 8.04      | 15.06     |
|                  | Rep3 | 4.61                        | 8.25      | 15.34     |
| <b>MRPL51</b>    | Rep1 | 2.65                        | 4.75      | 10.34     |
|                  | Rep2 | 1.68                        | 4.22      | 11.1      |
|                  | Rep3 | 2.66                        | 4.74      | 11.33     |
| <b>MALAT1</b>    | Rep1 | 8.71                        | 12.36     | 15.57     |
|                  | Rep2 | 7.32                        | 11.55     | 15.89     |
|                  | Rep3 | 8.95                        | 12.16     | 16.22     |

Supplementary Table 5: Calculated qPCR Recovery Data of RNA-Seq Transcripts

| <b>Calculated RNA Recovery (mean <math>\pm</math> S.D., 3 replicates)</b> |                  |                    |                      |
|---------------------------------------------------------------------------|------------------|--------------------|----------------------|
|                                                                           | E Coli TGT       | TGT Dimer          | No Enzyme            |
| <b>HDAC2-TAG</b>                                                          | 59.4 $\pm$ 7.9 % | 45.0 $\pm$ 1.6%    | 0.73 $\pm$ 0.12%     |
| <b>FTH1</b>                                                               | 14.5 $\pm$ 3.1%  | 1.35 $\pm$ 0.05%   | 0.017 $\pm$ 0.002%   |
| <b>RPS6</b>                                                               | 7.60 $\pm$ 3.74% | 0.79 $\pm$ 0.14%   | 0.010 $\pm$ 0.003%   |
| <b>RPL41</b>                                                              | 5.02 $\pm$ 0.86% | 0.36 $\pm$ 0.03%   | 0.003 $\pm$ 0.001%   |
| <b>MRPL51</b>                                                             | 21.0 $\pm$ 8.9%  | 4.27 $\pm$ 0.95 %  | 0.054 $\pm$ 0.021%   |
| <b>MALAT1</b>                                                             | 0.36 $\pm$ 0.23% | 0.025 $\pm$ 0.008% | 0.0017 $\pm$ 0.0004% |

Supplementary Table 6: qPCR Ct values from lysate purification

|                  |            | Rep1     | Rep2    | Rep3   |
|------------------|------------|----------|---------|--------|
| <b>HDAC2-TAG</b> | E Coli TGT | 19.97304 | 19.4716 | 19.509 |
|                  | TGT dimer  | 20.42991 | 19.9254 | 20.206 |
|                  | No enzyme  | 27.73386 | 26.1111 | 27.77  |
| <b>GAPDH</b>     | E Coli TGT | 21.16293 | 20.2132 | 20.522 |
|                  | TGT dimer  | 24.16379 | 23.8605 | 23.997 |
|                  | No enzyme  | 25.1854  | 24.3525 | 25.03  |
| <b>Actin</b>     | E Coli TGT | 25.03013 | 24.2149 | 24.018 |
|                  | TGT dimer  | 25.30845 | 25.0633 | 25.064 |
|                  | No enzyme  | 25.39997 | 24.3181 | 25.256 |

Supplementary Table 7: Calculated Enrichment values from lysate purification

|              | E Coli TGT   | TGT dimer    |
|--------------|--------------|--------------|
| <b>HDAC</b>  | 130.2 ± 37.5 | 145.3 ± 22.0 |
| <b>GAPDH</b> | 12.9 ± 3.4   | 2.0 ± 0.3    |

## Supplementary Notes

### Gene Sequences

The gene sequences for each construct are listed below (from the T7 promoter to the restriction cut site, or transcription stop site), with the TAG recognition element underlined. Mutated HOTAIR constructs were prepared using Q5 site directed mutagenesis with the following primers:

| Primer Name       | Sequence                    |
|-------------------|-----------------------------|
| HOTAIR-H12TAG-Fwd | aaaCTGGTAGAAAAAGCAACCACGAAG |
| HOTAIR-H12TAG-Rev | acagCTGGCTTAGGCCCCAACG      |
| HOTAIR-H22TAG-Fwd | aaaGCACCCGGCTCGGGTCAG       |
| HOTAIR-H22TAG-Rev | acagGCACCCGCTCAGGTTTTCCAG   |
| HOTAIR-H23TAG-Fwd | aaaGCCCCGCCCTCGCGCC         |
| HOTAIR-H23TAG-Rev | acagGCCCCGTGTGGGGCAGTGCC    |
| HOTAIR-H51TAG-Fwd | aaaTCCCAATGCCTGAACTTC       |
| HOTAIR-H51TAG-Rev | acagTCTCCATCTGCTGATTTTTTTC  |

*Control-TAG*

GGGAGACCCAAGCTGGCTAGCGTTTAAACTTAAGCTTGGTACCGAGCTCGGATCCTCTAACACAGACTCTCGGTACCATCATTTTCAT  
ATCCCCGGGAGCAGACTGTAAATCTGCTCCCACCACCATCATTTAATGAATTCCATCAGGAATCCCTCACTTCTGCAGACTGGCCGTCG  
TTTTACTCGAGT

*HDAC2-TAG*

GGGAGACCCAAGCTGGCTAGCGTTTAAACTTAAGCTTGGTACCGAGCTCGGATCCTGACAGTCTACCAATTTAGAAAATCATTA  
AAGAAAATATTGAAAGGAAAATGTTTTCTTTTGAAGACTTCTGGCTCATTTTATACTACTTTGGCATGGACTGTATTTATTTCAAAT  
GGCTTTTTCGTTTTGTTTTCTTGGCAAGTTTTATTGTGAGTTTTCTAATTATGAAGCAAATTTCTTTTCTCCACCATGCTTTATGTG  
ATAGTATTTAAAATTGATGTGAGTTATTATGTCAAAAAAAGTATCTAATAAAGAAGTAATTGGCCTTTCTGAGCTGATATCTAACACA  
GACTCTCGGTACCATCATTTTCATATCCCCGGGAGCAGACTGTAAATCTGCTCCCACCACCATCATTTAATGAATTCCATCAGGAATCC  
CTCACTTCTGCAGACTGGCCGTCGTTTTACTCGAGT

*$\beta$ -Actin-TAG*

GGGAGACCCAAGCTGGCTAGCACCGCCGAGACCGCTCCGCCCGCGAGCACAGAGCCTCGCCTTTGCCGATCCGCCGCCCGTCCAC  
ACCCGCCGCCAGCTCACCATGGATGATGATATCGCCGCGCTCGTCGTCGACAACGGCTCCGGCATGTGCAAGGCCGGCTTCGCGGGC  
GACGATGCCCCCGGGCCGTCTCCCTCCATCGTGGGGCGCCCCAGGCACCAGGGCGTGATGGTGGGCATGGGTGAGAAGGATTC  
CTATGTGGGCGACGAGGCCAGAGCAAGAGAGGCATCCTCACCTGAAGTACCCATCGAGCACGGCATCGTACCAACTGGGACG  
ACATGGAGAAAATCTGGCACCACACCTTCTACAATGAGCTGCGTGTGGCTCCCGAGGAGCACCCCGTGCTGCTGACCGAGGCCCC  
TGAACCCCAAGGCCAACCGGAGAAGATGACCCAGATCATGTTTGGACCTTCAACACCCAGCCATGTACGTTGCTATCCAGGCTGT  
GCTATCCCTGTACGCTCTGGCCGTACCACTGGCATCGTGATGGACTCCGGTGACGGGGTCAACCACTGTGCCATCTACGAGGG  
GTATGCCCTCCCCATGCCATCCTGCGTCTGGACCTGGCTGGCCGGGACCTGACTGACTACCTCATGAAGATCCTCACCGAGCGCGG  
TACAGCTTCACCACCACGGCCGAGCGGGAAATCGTGCGTGACATTAAGGAGAAGCTGTGCTACGTCGCCCTGGACTTCGAGCAAGA  
GATGGCCACGGCTGCTCCAGCTCCTCCCTGGAGAAGAGCTACGAGCTGCCTGACGGCCAGGTCATCACCATGGCAATGAGCGGTT  
CCGCTGCCCTGAGGCACTCTCCAGCCTTCTTCTGGGCATGGAGTCTGTGGCATCCACGAACTACCTTCACTCCATCATGAAGT  
GTGACGTGGACATCCGCAAAGACCTGTACGCCAACACAGTGCTGTCTGGCGGCACCACCATGTACCCTGGCATTGCCGACAGGATGC  
AGAAGGAGATCACTGCCCTGGCACCCAGCACAAATGAAGATCAAGATCATTGCTCCTCCTGAGCGCAAGTACTCCGTGTGGATCGGCG  
GCTCCATCCTGGCCTCGCTGTCCACCTTCCAGCAGATGTGGATCAGCAAGCAGGAGTATGACGAGTCCGGCCCTCCATCGTCCACCG  
CAAATGCTTCTAGGCGGACTATGACTTAGTTGCGTTACACCTTTCTTGACAAAACCTAACTTGCGCAGAAAACAAGATGAGATTGGC  
ATGGCTTTATTTGTTTTTTTTGTTTTGTTTTGTTTTTTTTTTTTTTTTTTGGCTTGACTCAGGATTTAAAAACTGGAACGGTGAAGTGACA  
GCAGTCGTTGGAGCGAGCATCCCCAAAGTTTCAAAATGTGGCCGAGGACTTTGATTGCACATTGTTGTTTTTTAATAGTCATTCCA  
AATATGAGATGCGTTGTTACAGGAAGTCCCTTCCATCCTAAAAGCCACCCCACTTCTCTAAGGAGAATGGCCAGTCCCTCCCA  
AGTCCACACAGGGGAGGTGATAGCATTGCTTTGCGTGTAAATTATGTAATGCAAAATTTTTTAACTTTCGCCTAATACTTTTTTATTT  
GTTTTATTTGAATGATGAGCCTTCGTGCCCCCTTCCCTTTTTTTGTCGCCAACTTGAGATGTATGAAGGCTTTTGGTCTCCCTGG  
GAGTGGGTGGAGGCAGCCAGGGCTTACCTGTACTGACTTGGAGACCAGTTGGGATCCTAACACAGACTCTCGGTACCATCATTT  
TCATATCCCCGGGAGCAGACTGTAAATCTGCTCCCACCACCATCATTTAATGAATTCCATCAGGAATCCCTCACTTCTGCAGACTGGCC  
GTCGTTTTACTCGAGT

*7SK-TAG*

GGATCCCCGGGAGCAGACTGTAAATCTGCTCCCACCACCGGATGTGAGGGCGATCTGGCTGCGACATCTGTCACCCCATGATCGCC  
AGGGTTGATTCGGCTGATCTGGCTGGCTAGGCGGGTGTCCCTTCCCTCACCGCTCCATGTGCGTCCCTCCCGAAGCTGCGCGCT  
CGGTGAAAGAGGACGACCATCCCCGATAGAGGAGGACCGGTCTTCGGTCAAGGGTATACGAGTAGCTGCGCTCCCTGCTAGAACC  
TCCAACAAGCTCTCAAGGTCCATTTGTAGGAGAACGTAGGGTAGTCAAGCTTCCAAGACTCCAGACACATCCAATGAGGCGCTGC  
ATGTGGCAGTCTGCCTTTCTTTT

*HOTAIR*

GGGACTCGCCTGTGCTCTGGAGCTTGATCCGAAAGCTTCCACAGTGAGGACTGCTCCGTGGGGGTAAGAGAGCACCAGGCACTGAG  
GCCTGGGAGTTCCACAGACCAACACCCCTGCTCCTGGCGGCTCCACCCGGGGCTTAGACCCTCAGGTCCCTAATATCCCGGAGGTG  
CTCTCAATCAGAAAGGTCTGCTCCGCTTCGAGTGGAATGGAACGGATTTAGAAGCCTGCAGTAGGGGAGTGGGGAGTGGAGAG



AGGGAGCCCAGAGTTACAGACGGCGGCGAGAGGAAGGAGGGGCGTCTTTATTTTTTAAAGGCCCAAAGAGTCTGATGTTTACAAG  
ACCAGAAATGCCACGGCCGCTCCTGGCAGAGAAAAGGCTGAAATGGAGGACCGGCGCCTTCTTATAAGTATGCACATTGGCGAG  
AGAATTAAGTGCTGCAACCTAAACCAGCAATTACACCCAAGCTCGTTGGGGCCTAAGCCAGTACCGACCTGGTAGAAAAAGCAACCA  
CGAAGCTAGAGAGAGAGCCAGAGGAGGGAAGAGAGCGCCAGACGAAGGTGAAAGCGAACCACGCAGAGAAATGCAGGCAAGGG  
AGCAAGGCGGCAGTCCCGGAACAAACGTGGCAGAGGGCAAGACGGGCACTCACAGACAGAGTTTATGTATTTTTATTTTTAAAA  
TCTGATTTGGTGTTCATGAGGAAAAGGAAAATCTAGGGAACGGGAGTACAGAGAGAATAATCCGGGTCTAGCTCGCCACATGA  
ACGCCCAGAGAACGCTGGAAAAACCTGAGCGGGTGC CGGGCAGCACCCGGCTCGGGTCAGCCACTGCCCCACACCGGGCCACCA  
AGCCCCGCCCTCGCGCCACCGGGGCTTCTTGCTCTTATCATCTCCATCTTATGATGAGGCTTGTTAAACAAGACCAGAGAGCT  
GGCCAAGCACCTCTATCTCAGCCGCGCCCGCTCAGCCGAGCAGCGGTGGTGGGGGACTGGGAGGCGTAATTAATTGATTCCTT  
GGACTGTAAAATATGGCGGCGTCTACACGGAACCCATGGACTCATAACAATATATCTGTTGGGCGTGAGTGCCTGTCTCTCAAT  
AATTTTTCCATAGGCAAATGTCAGAGGGTCTGGATTTTTAGTTGCTAAGGAAAGATCCAAATGGGACCAATTTAGGAGGCCAAA  
CAGAGTCCGTTCAAGTGTGAGAAAATGCTTCCCAAAGGGTGGCAGTGTGTTTTGTTGGAAAAAGCTTGGGTTATAGGAAAGCCTT  
TCCCTGCTACTTGTGTAGACCCAGCCCAATTAAGAATTACAAGGAAGCGAAGGGTGTGTAGGCCGGAAGCCTCTGTCCCGGC  
TGGATGCAGGGGACTTGAGCTGCTCCGGAATTTGAGAGGAACATAGAAGCAAAGGTCCAGCCTTGTCTCGTGCTGATTCCTAGACT  
TAAGATTCAAAAACAAATTTTTAAAAGTGAAACCAGCCCTAGCCTTGGAAAGCTTGAAGGTTGAGCACCCACCCAGGAATCCACCT  
GCCTGTTACACGCTCTCCAAGACACAGTGGCACCCTTTCTAACTGGCAGCACAGAGCAACTCTATAATATGCTTATATTAGGTCTA  
GAAGAATGCATCTTGAGACACATGGGTAACCTAATTATATAATGCTTGTTCATACAGGAGTGATTATGCAGTGGGACCCTGCTGCA  
AACGGGACTTTGCACTCTAAATATAGGCCCCAGCTTGGGACAAAAGTTGCAGTAGAAAAATAGACATAGGAGAACCTTAAATAAGT  
GATGCATGTAGACACAGAAGGGGTATTTAAAAGACAGAAATAATAGAAGTACAGAAGAACAGAAAAAAAATCAGCAGATGGAGAT  
TACCATTCCCAATGCCTGAACCTCCTCTGCTATTAAGATTGCTAGAGAATTGTGTCTTAAACAGTTCATGAACCCAGAAGAACGCAAT  
TTCAATGTATTTAGTACACACACAGTATGTATATAAACACAACCTCACAGAATATATTTCCATACATTGGGTAGGTATGCACTTTGTG  
ATATATAATAATGTATTTTCCATGCAGTTTTAAAATGTAGATATATTAATATCTGGATGCATTTTCG

*5'TAG-HOTAIR*

GGGGAGCAGACTGTAATCTGCTCCGACTCGCTGTGCTCTGGAGCTTGATCCGAAAGCTTCCACAGTGAGGACTGCTCCGTGGG  
GGTAAGAGAGCACCAGGCACTGAGGCCTGGGAGTTCCACAGACCAACACCCTGCTCCTGGCGGCTCCCACCCGGGGCTTAGACCC  
TCAGGTCCTAATATCCCGGAGGTGCTCTCAATCAGAAAGGTCTGCTCCGCTTCGCAGTGAATGGAACGGATTTAGAAGCCTGCA  
GTAGGGGAGTGGGAGTGGAGAGAGGGAGCCAGAGTTACAGACGGCGGCGAGAGGAAGGAGGGGCGTCTTTATTTTTTAAAGG  
CCCCAAAGAGTCTGATGTTTACAAGACCAGAAATGCCACGGCCGCTCCTGGCAGAGAAAAGGCTGAAATGGAGGACCGGCGCCTT  
CCTTATAAGTATGCACATTGGCGAGAGAAATTAAGTGTGCAACCTAAACCAGCAATTACACCAAGCTCGTTGGGGCCTAAGCCAGT  
ACCGACCTGGTAGAAAAAGCAACCACGAAGCTAGAGAGAGAGCCAGAGGAGGGAAGAGAGCGCCAGACGAAGGTGAAAGCGAAC  
CACGCAGAGAAATGCAGGCAAGGGAGCAAGGCGGCAGTCCCGGAACAAACGTGGCAGAGGGCAAGACGGGCACTCACAGACAG  
AGGTTTATGTATTTTTATTTTTAAAATCTGATTTGGTGTTCATGAGGAAAAGGAAAATCTAGGGAACGGGAGTACAGAGAGAAT  
AATCCGGGTCTAGCTCGCCACATGAACGCCAGAGAACGCTGAAAAACCTGAGCGGGTGC CGGGCAGCACCCGGCTCGGGTCA  
GCCACTGCCCCACACCGGGCCACCAAGCCCCGCCCTCGCGGCCACCGGGGCTTCTTGCTCTTCTTATCATCTCCATCTTTATGATG  
AGGCTTGTTAAACAAGACCAGAGAGCTGGCCAAGCACCTCTATCTCAGCCGCGCCGCTCAGCCGAGCAGCGGTGGTGGGGGACT  
GGGAGGCGCTAATTAATTGATTCCTTTGGACTGAAAATATGGCGGCGTCTACACGGAACCCATGGACTCATAACAATATATCTGTT  
GGGCGTGAGTGCCTGTCTCTCAATAATTTTTCCATAGGCAAATGTCAGAGGGTTCTGGATTTTTAGTTGCTAAGGAAAGATCCAAA  
TGGGACCAATTTTAGGAGGCCCAAACAGAGTCCGTTCAAGTGTGAGAAAATGCTTCCCAAAGGGTGGCAGTGTGTTTTGTTGGAAA  
AAAGCTTGGGTTATAGGAAAGCCTTTCCCTGCTACTTGTGTAGACCCAGCCCAATTAAGAATTACAAGGAAGCGAAGGGGTTGTG  
AGGCCGGAAGCCTCTGTCCCGGCTGGATGCAGGGGACTTGAGCTGCTCCGGAATTTGAGAGGAACATAGAAGCAAAGGTCCAGC  
CTTTGCTTCGTGCTGATTCCTAGACTTAAGATTCAAAAACAAATTTTTAAAAGTGAAACCAGCCCTAGCCTTGGAAAGCTTTGAAGT  
TCAGCACCCACCCAGGAATCCACCTGCCTGTACACGCTCTCCAAGACACAGTGGCACCCTTTCTAACTGGCAGCACAGAGCAAC  
TCTATAATATGCTTATATTAGGTCTAGAAGAATGCATCTTGAGACACATGGGTAACCTAATTATATAATGCTTGTTCATACAGGAGTG  
ATTATGCAGTGGGACCCTGCTGCAAACGGGACTTTGCACTCTAAATATAGGCCCCAGCTTGGGACAAAAGTTGCAGTAGAAAAATAG  
ACATAGGAGAACAATTAATAAGTATGCATGTAGACACAGAAGGGGATTTAAAAGACAGAAATAATAGAAGTACAGAAGAACAG  
AAAAAAAATCAGCAGATGGAGATTACCATTCCCAATGCCTGAACCTCCTCTGCTATTAAGATTGCTAGAGAATTGTGTCTTAAACAG  
TTCATGAACCCAGAAGAACGCAATTTCAATGTATTTAGTACACACACAGTATGTATATAAACACAACCTCACAGAATATATTTCCATAC

ATTGGGTAGGTATGCACTTTGTGTATATATAATAATGTATTTTCCATGCAGTTTTAAAATGTAGATATATTAATATCTGGATGCATTTTC  
G

5'TAG Antisense HOTAIR

GGGGGAGCAGACTGTAAATCTGCTCCCGAAAATGCATCCAGATATTAATATATCTACATTTTAAAACATGCATGGAAAATACATTATTA  
TATATACACAAAGTGCATACCTACCCAATGTATGGAAAATATATTCTGTGAGTTGTGTTTATATACATACTGTGTGTACTAAATACA  
TTGAAATTGCGTTCTTCTGGGTTTCATGAAGTGTAAAGACACAATTCTCTAGCAATCTTAATAGCAGGAGGAAGTTCAGGCATTGGGA  
ATGGTAATCTCCATCTGCTGATTTTTTTCTGTTCTTCTGTACTTCTATTATTTCTGTCTTTAAATACCCCTTCTGTGTCTACATGCATCA  
CTTATTTAAGTGTCTCCTATGTCTATTTTTCTACTGCAACTTTTGTCCCAAGCTGGGGCTATATTTAGAGTGCAAAGTCCCGTTTGCA  
GCAGGGTCCCACTGCATAATCACTCCTGTATGGAACAAGCATTATATAATTAGGTTACCCATGTGTCTCAAGATGCATTCTTCTAGACC  
TAATATAAGCATATTATAGAGTTGCTCTGTGCTGCCAGTTAGAAAAGCGGTGCCACTGTGTCTTGAGAGGGCGTGTAAACAGGCAGGT  
GGATTCTGGGTGGGTGCTGAACCTTCAAGAGCTTCAAAGGCTAGGGCTGGTTTCACTTTTAAAAATTTGTTTTGAATCTTAAGTCT  
AGGAATCAGCACGAAGCAAAGGCTGGACCTTGTCTATGTTCTCTCAAATTCCGGAGCAGCTCAAGTCCCTGCATCCAGCCGGG  
ACAGAGAGGCTTCCGGCCTACACAACCCCTTCGCTTCTTGAATTCTTAAATTGGGCTGGGTCTACACAAGTAGCAGGGAAAGGCTT  
TCCTATAACCCAAGCTTTTTTCCAACAAAACACACTGCCAACCTTGGGGAAGCATTTTCTGACACTGAACGGACTCTGTTGGGCCT  
CCTAAAATTGGTCCCATTTGGATCTTTCCTTAGCAACTAAAAATCCAGAACCCTCTGACATTTGCCTATGGAAAAATTATTTGAGAGAC  
AGTGCCTCACGCCAACAGATATATTGTTTATGAGTCCATGGGTTCCGTGTAGACGCCGCATATTTTACAGTCCAAAGGAATCAAT  
TAATTAGCGCCTCCAGTCCCCCACCAGCGCTGCTCGGCTGAGCGGGCGGGCTGAGATAGAGGTGCTTGCCAGCTCTCTGGTC  
TTGTTAACAAGCCTCATCATAAAGATGGAGATGATAAGAAGAGCAAGGAAGCCCCGGTGGCCGCGAGGGGCGGGGCTTGGTGGGC  
CCGGTGTGGGGCAGTGGCTGACCCGAGCCGGGTGCTGCCCCGGCACCCGCTCAGTTTTTCCAGCGTCTCTGGGCGTTCATGTGGC  
GAGCTAGGACCCGATTATTCTCTGTACTCCCGTTCCCTAGATTTTCCCTTTCTCATGGAACACCAAATCAGATTTTAAAAATAA  
AAATACATAAACCTCTGTCTGTGAGTGCCCGTCTTGCCTCTGCCACGTTTGTCCGGAACTGCCGCTTGTCCCTTGCCTGCATTTT  
TCTGCGTGGTTTCGTTTACCTTCTGCTGGCGCTCTTCCCTCTGCTCTCTAGCTTCGTGGTTGCTTTTTCTACCAGGTCGG  
TACTGGCTTAGGCCCAACGAGCTTGGGTGTAATTGCTGGTTAGGTTGCAGCACTTAATTCTCTCGCCAATGTGCATACTTATAAGG  
AAGGCGCCGTCCTCCATTTAGCCTTTTCTCTGCCAGGACGCGCCGTGGCATTCTGGTCTTGAAACATCAGACTCTTGGGGCC  
TTAAAAAATAAAGACGCCCTCCTTCTCTCGCCGCGCTGTGAACTCTGGGCTCCCTCTCTCCACTCCCCACTCCCCACTGCAGGCT  
TCTAAATCCGTTCCATTCCTGCGAAGCGGAGCAGGACCTTCTGATTGAGAGCACCTCCGGGATATTAGGGACCTGAGGGTCTAA  
GCCCCGGTGGGAGCCGAGGAGCAGGGGTGTTGGTCTGTGAACTCCAGGCCTCAGTGCCTGGTGTCTCTTACCCCCACGGA  
GCAGTCTCACTGTGGAAGCTTTCGGATCAAGCTCCAGAGCACAGGCGAGTCG

Primers used for RT-qPCR

| Primer             | Sequence                       |
|--------------------|--------------------------------|
| HDAC2-TAG RT       | CTCCCGGGGATATGAAAATG           |
| GAPDH RT           | GTGAAGACGCCAGTG                |
| β-actin RT         | GTGGATGCCACAGGAC               |
| LBR RT             | CTTCATAATAAAGTGAACCTCCAG       |
| 18S RT             | GAGGGCCTCACTAAACC              |
| U1 RT              | CCCACTACCACAAATTATGC           |
| HDAC2-TAG qPCR fwd | AATTTCTTTTCTCCACCATGCTTTATGTG  |
| HDAC2-TAG qPCR rev | GAAAATGATGGTACCGAGAGTCTGTGTTAG |
| GAPDH qPCR fwd     | AATCCCATCACCATCTTCCA           |
| GAPDH qPCR rev     | TGGACTCCACGACGTACTCA           |
| β-actin qPCR fwd   | AGAGCTACGACGTGCCTGAC           |
| β-actin qPCR rev   | CTCCATGCCAGGAAGGAAGG           |
| LBR qPCR fwd       | TGCTGTGCGACTATTCTCC            |
| LBR qPCR rev       | CAGGCCATCGACCTTACC             |
| 18S qPCR fwd       | GTAACCCGTTGAACCCC              |
| 18S qPCR rev       | CCATCCAATCGGTAGTAGCG           |
| U1 qPCR fwd        | CCATGATCACGAAGGTGGTTT          |

|                 |                           |
|-----------------|---------------------------|
| U1 qPCR rev     | ATGCAGTCGAGTTTCCCACAT     |
| FTH1 qPCR fwd   | CCAGAACTACCACCAGGACTC     |
| FTH1 qPCR rev   | GTCAAAGTAGTAAGACATGGACAGG |
| RPS6 qPCR fwd   | AAGCACCCAAGATTCAGCGT      |
| RPS6 qPCR rev   | TAGCCTCCTTCATTCTCTTGGC    |
| RPL41 qPCR fwd  | AGCCAAGTGGAGGAAGAAGC      |
| RPL41 qPCR rev  | AGCGTCTGGCATTCCATGTT      |
| MALAT1 qPCR fwd | TGGTGATGAAGGTAGCAGGC      |
| MALAT1 qPCR rev | ATTGCCGACCTCACGGATTT      |
| MRPL51 qPCR fwd | AAGCTTCTCTCTTGGTGTGC      |
| MRPL51 qPCR rev | CCAGGATCCCGATGTTGTCA      |

#### preQ<sub>1</sub>-biotin Characterization Data

<sup>1</sup>H NMR (500 MHz, CD<sub>3</sub>OD) δ 6.85 (s, 1H), 4.50 (dd, *J* = 7.8, 4.4 Hz, 1H), 4.31 (dd, *J* = 7.9, 4.5 Hz, 1H), 3.24 – 3.15 (m, 4H), 3.06 (t, *J* = 9.5 Hz, 2H), 2.93 (dd, *J* = 12.6, 5.1 Hz, 1H), 2.71 (d, *J* = 12.7 Hz, 1H), 2.20 (t, *J* = 7.3 Hz, 3H), 1.79 – 1.32 (m, 18H). <sup>13</sup>C NMR (126 MHz, CD<sub>3</sub>OD) δ 174.62, 166.64, 164.73, 161.25, 153.10, 152.57, 117.69, 108.43, 98.21, 61.98, 60.19, 55.66, 46.19, 43.37, 39.64, 38.57, 35.37, 28.76, 28.38, 28.12, 25.89, 25.62, 25.57.

HRMS [M+H]<sup>+</sup> *m/z* calcd. for [C<sub>23</sub>H<sub>37</sub>N<sub>8</sub>O<sub>3</sub>S] + 505.2704, found 505.2707 ( $\Delta$  = 0.6 ppm).

#### References

- (1) Alexander, S. C.; Busby, K. N.; Cole, C. M.; Zhou, C. Y.; Devaraj, N. K. Site-Specific Covalent Labeling of RNA by Enzymatic Transglycosylation. *J. Am. Chem. Soc.* **2015**, *137* (40), 12756–12759. <https://doi.org/10.1021/jacs.5b07286>.
